# Supplementary material for: HLA Class II Allele Groups Involved in Autoimmune Thyroid Diseases: Hashimoto’s Thyroiditis and Basedow–Graves Disease
Source: MDPI journal article supplement (doi:10.3390/life14040441), 2024-03-27
Supplement: s1 [file s1]

# HLA Class II Allele Groups Involved in Autoimmune Thyroid Diseases: Hashimoto's Thyroiditis and Basedow-Graves Disease

Alin-Dan Chiorean <sup>1,2</sup>, Gheorghe Zsolt Nicula <sup>1</sup>, Ștefana Bâlici <sup>1</sup>, Mihaela Laura Vică <sup>1,3,\*</sup>, Luminita-Ioana Iancu Loga <sup>4</sup>, Lucia Dican <sup>4,5</sup> and Horea Vladi Matei <sup>1,3</sup>

<sup>1</sup> Department of Cell and Molecular Biology, Faculty of Medicine, "Iuliu Hațieganu"

University of Medicine and Pharmacy, 400349 Cluj-Napoca, România;

Chiorean.Alin@umfcluj.ro (A.D.C.); gnicula@umfcluj.ro (G.Z.N.); sbalici@umfcluj.ro (Ș.B.);

mvica@umfcluj.ro (M.L.V.); hmatei@umfcluj.ro (H.V.M.)

<sup>2</sup> Emergency Clinical Hospital for Children, 400370 Cluj-Napoca, România

<sup>3</sup> Institute of Legal Medicine Cluj-Napoca, 400006 Cluj-Napoca, România

<sup>4</sup> Clinical Institute of Urology and Renal Transplantation, 400000 Cluj-Napoca, Romania;

luminisloga@yahoo.com (L.I.I.L.)

<sup>5</sup> Department of Medical Biochemistry, Faculty of Medicine, "Iuliu-Hațieganu" University of Medicine and Pharmacy, 400012 Cluj-Napoca, Romania; lucia.dican@umfcluj.ro (L.D.)

\* Correspondence: mvica@umfcluj.ro (M.L.V.)

## Supplemental Table of Contents

|                                                                                                                                                                                                |          |
|------------------------------------------------------------------------------------------------------------------------------------------------------------------------------------------------|----------|
| <b>Comparison between autoimmune thyroid diseases (AITD), Hashimoto's thyroiditis (HT), Basedow-Graves disease (BGD) and control groups, based on genotypes resulting from HLA-DRB1 typing</b> | <b>2</b> |
| Table S1. Logistic regressions predicting AITD group compared to control, based on HLA-DRB1 genotypes                                                                                          | 2        |
| Table S2. Logistic regressions predicting HT subgroup compared to control, based on HLA-DRB1 genotypes                                                                                         | 3        |
| Table S3. Logistic regressions predicting BGD subgroup compared to control, based on HLA-DRB1 genotypes                                                                                        | 4        |
| <b>Comparison between autoimmune thyroid diseases (AITD), Hashimoto's thyroiditis (HT), Basedow-Graves disease (BGD) and control groups, based on genotypes resulting from HLA-DQB1 typing</b> | <b>6</b> |
| Table S4. Logistic regressions predicting AITD group compared to control, based on HLA-DQB1 genotypes                                                                                          | 6        |
| Table S5. Logistic regressions predicting HT subgroup compared to control, based on HLA-DQB1 genotypes                                                                                         | 6        |
| Table S6. Logistic regressions predicting BGD subgroup compared to control, based on HLA-DQB1 genotypes                                                                                        | 7        |
| <b>Comparison between autoimmune thyroid diseases (AITD), Hashimoto's thyroiditis (HT), Basedow-Graves disease (BGD) and control groups, based on HLA-DRB1/DQB1 haplotypes resulting</b>       | <b>8</b> |
| Table S7. Logistic regressions predicting AITD group compared to control, based on HLA-DRB1/DQB1 haplotypes                                                                                    | 8        |
| Table S8. Logistic regressions predicting HT subgroup compared to control, based on HLA- DRB1/DQB1 haplotypes                                                                                  | 9        |
| Table S9. Logistic regressions predicting BGD subgroup compared to control, based on HLA- DRB1/DQB1 haplotypes                                                                                 | 10       |

**Comparison between autoimmune thyroid diseases (AITD), Hashimoto's thyroiditis (HT), Basedow-Graves disease (BGD) and control groups, based on genotypes resulting from HLA-DRB1 typing**

When analyzing the relationship between HLA-DRB1 genotypes and AITD, HT and BGD, a strong association of the thyroid pathology with the \*03/\*16 genotype was observed (Tables S1, S2 and S3).

Table S1. Logistic regressions predicting AITD group compared to control, based on HLA-DRB1 genotypes.

| HLA-DRB1 genotype | AITD group (n = 77) |              | Control group (n = 135) |             | OR (95% C.I.)            | RR (95% C.I.)          | p*            |
|-------------------|---------------------|--------------|-------------------------|-------------|--------------------------|------------------------|---------------|
|                   | No.                 | %            | No.                     | %           |                          |                        |               |
| *01/*01           | 1                   | 1.30         | 0                       | 0.00        | 5.3(0.21-132.2)          | 2.77(2.31-3.32)        | 0.36          |
| *01/*03           | 2                   | 2.60         | 0                       | 0.00        | 8.9(0.42-3.35)           | 2.8(2.33-3.35)         | 0.13          |
| *01/*04           | 3                   | 3.90         | 3                       | 2.22        | 1.78(0.35-9.06)          | 1.39(0.61-3.16)        | 0.67          |
| *01/*07           | 2                   | 2.60         | 8                       | 5.93        | 0.2 (0.02 -1.7)          | 0.29(0.05-1.9)         | 0.16          |
| *01/*11           | 4                   | 5.19         | 7                       | 5.19        | 1(0.28 - 3.54)           | 1(-0.44 -2.23)         | 1.00          |
| *01/*13           | 2                   | 2.60         | 6                       | 4.44        | 0.57( 0.11-2. 91)        | 0.68(0. 20-2.29)       | 0.71          |
| *01/*15           | 3                   | 3.90         | 2                       | 1.48        | 2.69(0.44-16.51)         | 1.67(0.80-3.51)        | 0.35          |
| *01/*16           | 2                   | 2.60         | 2                       | 1.48        | 1.77(0.24- 12.85)        | 1.38(0.51-3.75)        | 0.62          |
| *03/*03           | 0                   | 0.00         | 1                       | 0.74        | 0.57(0.02-14.39)         | 0                      | 1.00          |
| *03/*04           | 2                   | 2.60         | 0                       | 0.00        | 8.9(0.42-3.35)           | 2.8(2.33-3.35)         | 0.13          |
| *03/*07           | 0                   | 0.00         | 2                       | 1.48        | 0.34(0.01-7.27)          | 0                      | 0.53          |
| *03/*08           | 1                   | 1.30         | 0                       | 0.00        | 5.3(0.21-132.2)          | 2.77(2.31-3.32)        | 0.36          |
| *03/*09           | 0                   | 0.00         | 1                       | 0.74        | 0.57(0.02-14.39)         | 0                      | 1.00          |
| *03/*11           | 4                   | 5.19         | 8                       | 5.93        | 0.87(0.25 – 2.99)        | 0.91(-0.40 -2.07)      | 1.00          |
| *03/*13           | 1                   | 1.30         | 2                       | 1.48        | 0.87(0.07-9.81)          | 0.91(0.18-4.5^)        | 1.00          |
| *03/*14           | 0                   | 0.00         | 2                       | 1.48        | 0.34(0.01-7.27)          | 0                      | 0.53          |
| *03/*15           | 3                   | 3.90         | 2                       | 1.48        | 2.69(0.44-16.51)         | 1.67(0.80-3.51)        | 0.35          |
| *03/*16           | <b>8</b>            | <b>10.39</b> | <b>0</b>                | <b>0.00</b> | <b>33.14(1.88-583.1)</b> | <b>2.95(2.44-3.58)</b> | <b>0.0002</b> |
| *04/*04           | 0                   | 0.00         | 1                       | 0.74        | 0.57(0.02-14.39)         | 0                      | 1.00          |
| *04/*07           | 1                   | 1.30         | 0                       | 0.00        | 5.3(0.21-132.2)          | 2.77(2.31-3.32)        | 0.36          |
| *04/*11           | 1                   | 1.30         | 0                       | 0.00        | 5.3(0.21-132.2)          | 2.77(2.31-3.32)        | 0.36          |
| *04/*12           | 0                   | 0.00         | 1                       | 0.74        | 0.57(0.02-14.39)         | 0                      | 1.00          |
| *04/*13           | 2                   | 2.60         | 2                       | 1.48        | 1.77(0.24- 12.85)        | 1.38(0.51-3.75)        | 0.62          |
| *04/*15           | 2                   | 2.60         | 5                       | 3.70        | 0.69(0.13-3.66)          | 0.78(0.23-2.55)        | 1.00          |
| *04/*16           | 0                   | 0.00         | 2                       | 1.48        | 0.34(0.01-7.27)          | 0                      | 0.53          |
| *07/*07           | 1                   | 1.30         | 1                       | 0.74        | 1.76(0.1-28.61)          | 1.38(0.34-5.6)         | 1.00          |
| *07/*08           | 1                   | 1.30         | 0                       | 0.00        | 5.3(0.21-132.2)          | 2.77(2.31-3.32)        | 0.36          |
| *07/*11           | 4                   | 5.19         | 7                       | 5.19        | 1(0.28 - 3.54)           | 1(0.44 -2.23)          | 1.00          |
| *07/*12           | 0                   | 0.00         | 1                       | 0.74        | 0.57(0.02-14.39)         | 0                      | 1.00          |
| *07/*13           | 0                   | 0.00         | 5                       | 3.70        | 0.15(0.008-2.8)          | 0                      | 0.16          |
| *07/*14           | 3                   | 3.90         | 1                       | 0.74        | 5.4(0.55-53.19)          | 2.1(1.16-3.82)         | 0.13          |
| *07/*15           | 2                   | 2.60         | 1                       | 0.74        | 3.57(0.31-40.09)         | 1.85(0.81-4.22)        | 0.29          |
| *07/*16           | 0                   | 0.00         | 3                       | 2.22        | 0.24(0.01-4.79)          | 0                      | 0.55          |
| *08/*13           | 0                   | 0.00         | 1                       | 0.74        | 0.57(0.02-14.39)         | 0                      | 1.00          |
| *08/*14           | 0                   | 0.00         | 1                       | 0.74        | 0.57(0.02-14.39)         | 0                      | 1.00          |
| *08/*16           | 0                   | 0.00         | 1                       | 0.74        | 0.57(0.02-14.39)         | 0                      | 1.00          |

|         |   |      |   |      |                    |                   |      |
|---------|---|------|---|------|--------------------|-------------------|------|
| *09/*09 | 1 | 1.30 | 0 | 0.00 | 5.3(0.21-132.2)    | 2.77(2.31-3.32)   | 0.36 |
| *09/*11 | 0 | 0.00 | 1 | 0.74 | 0.57(0.02-14.39)   | 0                 | 1.00 |
| *10/*13 | 0 | 0.00 | 4 | 2.96 | 0.18(0.01-3.55)    | 0                 | 0.29 |
| *10/*15 | 1 | 1.30 | 0 | 0.00 | 5.3(0.21-132.2)    | 2.77(2.31-3.32)   | 0.36 |
| *11/*11 | 5 | 6.49 | 6 | 4.44 | 1.49(0.44-5.06)    | 1.27(0.65 - 2.48) | 0.53 |
| *11/*13 | 0 | 0.00 | 8 | 5.93 | 0.09(0.005 - 1.7)  | 0                 | 0.05 |
| *11/*14 | 2 | 2.60 | 2 | 1.48 | 1.77(0.24- 12.85)  | 1.38(0.51-3.75)   | 0.62 |
| *11/*15 | 1 | 1.30 | 3 | 2.22 | 0.57 (0.06-5.66)   | 0.68(0.12 - 3.77) | 1.00 |
| *11/*16 | 4 | 5.19 | 2 | 1.48 | 3.64(0.65 - 20.38) | 1.88(1.03 - 3.41) | 0.19 |
| *13/*13 | 0 | 0.00 | 2 | 1.48 | 0.34(0.01-7.27)    | 0                 | 0.53 |
| *13/*14 | 0 | 0.00 | 2 | 1.48 | 0.34(0.01-7.27)    | 0                 | 0.53 |
| *13/*15 | 1 | 1.30 | 3 | 2.22 | 0.57 (0.06-5.66)   | 0.68(0.12 - 3.77) | 1.00 |
| *13/*16 | 2 | 2.60 | 4 | 2.96 | 0.87(0.15 - 4.88)  | 0.91(0.29 - 2.88) | 1.00 |
| *14/*16 | 0 | 0.00 | 1 | 0.74 | 0.57(0.02-14.39)   | 0                 | 1.00 |
| *15/*15 | 0 | 0.00 | 1 | 0.74 | 0.57(0.02-14.39)   | 0                 | 1.00 |
| *15/*16 | 2 | 2.60 | 3 | 2.22 | 1.17(0.19-7.18)    | 1.10(0.37 - 3.28) | 1    |
| *16/*16 | 1 | 1.30 | 4 | 2.96 | 0.43(0.05 - 3.92)  | 0.54(0.09 - 3.17) | 0.65 |

HLA, human leukocyte antigen; AITD, autoimmune thyroid disease; n, persons number; No., genotypes number; OR, odds ratio; CI, confidence interval; RR, risk ratio.

Table S2. Logistic regressions predicting HT subgroup compared to control, based on HLA-DRB1 genotypes.

| HLA-DRB1 genotype | HT subgroup (n = 52) |      | Control group (n = 135) |      | OR (95% C.I.)     | RR(95% C.I.)    | p*   |
|-------------------|----------------------|------|-------------------------|------|-------------------|-----------------|------|
|                   | No.                  | %    | No.                     | %    |                   |                 |      |
| *01/*01           | 1                    | 1.92 | 0                       | 0.00 | 7.89(0.32-197)    | 3.65(2.89-4.61) | 0.28 |
| *01/*03           | 2                    | 3.85 | 0                       | 0.00 | 13.42(0.63-284.5) | 3.70(2.92-4.69) | 0.08 |
| *01/*04           | 2                    | 3.85 | 3                       | 2.22 | 1.76(0.29-10.85)  | 1.46(0.48-4.37) | 0.62 |
| *01/*07           | 1                    | 1.92 | 8                       | 5.93 | 0.31(0.04-2.55)   | 0.39(0.06-2.50) | 0.45 |
| *01/*11           | 2                    | 3.85 | 7                       | 5.19 | 0.73(0.15-3.64)   | 0.79(0.23-2.75) | 1.00 |
| *01/*13           | 2                    | 3.85 | 6                       | 4.44 | 0.86(0.17-4.41)   | 0.90(0.26-3.04) | 1.00 |
| *01/*15           | 2                    | 3.85 | 2                       | 1.48 | 2.66(0.36-19.41)  | 1.83(0.67-5.02) | 0.31 |
| *01/*16           | 1                    | 1.92 | 2                       | 1.48 | 1.30(0.11-14.7)   | 1.2(0.24-6.86)  | 1.00 |
| *03/*03           | 0                    | 0.00 | 1                       | 0.74 | 0.85(0.03-21.31)  | 0               | 1.00 |
| *03/*04           | 1                    | 1.92 | 0                       | 0.00 | 7.89(0.32-197)    | 3.65(2.89-4.61) | 0.28 |
| *03/*07           | 0                    | 0.00 | 2                       | 1.48 | 0.51(0.02-10.78)  | 0               | 1.00 |
| *03/*08           | 1                    | 1.92 | 0                       | 0.00 | 7.89(0.32-197)    | 3.65(2.89-4.61) | 0.28 |
| *03/*09           | 0                    | 0.00 | 1                       | 0.74 | 0.85(0.03-21.31)  | 0               | 1.00 |
| *03/*11           | 3                    | 5.77 | 8                       | 5.93 | 0.97(0.25-3.82)   | 0.98(0.36-2.65) | 1.00 |
| *03/*13           | 0                    | 0.00 | 2                       | 1.48 | 0.51(0.02-10.78)  | 0               | 1.00 |
| *03/*14           | 0                    | 0.00 | 2                       | 1.48 | 0.51(0.02-10.78)  | 0               | 1.00 |
| *03/*15           | 1                    | 1.92 | 2                       | 1.48 | 1.30(0.11-14.7)   | 1.2(0.24-6.86)  | 1.00 |
| *03/*16           | 3                    | 5.77 | 0                       | 0.00 | 19.16(0.97-377.9) | 3.75(2.95-4.78) | 0.02 |
| *04/*04           | 0                    | 0.00 | 1                       | 0.74 | 0.85(0.03-21.31)  | 0               | 1.00 |
| *04/*07           | 1                    | 1.92 | 0                       | 0.00 | 7.89(0.32-197)    | 3.65(2.89-4.61) | 0.28 |
| *04/*11           | 1                    | 1.92 | 10                      | 7.41 | 0.25(0.03-1.97)   | 0.31(0.05-2.06) | 0.30 |
| *04/*12           | 0                    | 0.00 | 1                       | 0.74 | 0.85(0.03-21.31)  | 0               | 1.00 |
| *04/*13           | 2                    | 3.85 | 2                       | 1.48 | 2.66(0.36-19.41)  | 1.83(0.67-5.02) | 0.31 |
| *04/*15           | 2                    | 3.85 | 5                       | 3.70 | 1.04(0.20-5.54)   | 1.03(0.31-3.4)  | 1    |
| *04/*16           | 0                    | 0.00 | 2                       | 1.48 | 0.51(0.02-10.78)  | 0               | 1.00 |
| *07/*07           | 0                    | 0.00 | 1                       | 0.74 | 0.85(0.03-21.31)  | 0               | 1.00 |

|         |   |      |   |      |                  |                 |      |
|---------|---|------|---|------|------------------|-----------------|------|
| *07/*08 | 1 | 1.92 | 0 | 0.00 | 7.89(0.32-197)   | 3.65(2.89-4.61) | 0.28 |
| *07/*11 | 2 | 3.85 | 7 | 5.19 | 0.73(0.15-3.64)  | 0.79(0.23-2.75) | 1.00 |
| *07/*12 | 0 | 0.00 | 1 | 0.74 | 0.85(0.03-21.31) | 0               | 1.00 |
| *07/*13 | 0 | 0.00 | 5 | 3.70 | 0.23(0.01-4.16)  | 0               | 0.32 |
| *07/*14 | 1 | 1.92 | 1 | 0.74 | 2.63(0.16-42.83) | 1.81(0.44-7.4)  | 0.48 |
| *07/*15 | 2 | 3.85 | 1 | 0.74 | 5.36(0.48-60.45) | 2.45(1.06-5.65) | 0.19 |
| *07/*16 | 0 | 0.00 | 3 | 2.22 | 0.36(0.02-7.11)  | 0               | 0.56 |
| *08/*13 | 0 | 0.00 | 1 | 0.74 | 0.85(0.03-21.31) | 0               | 1.00 |
| *08/*14 | 0 | 0.00 | 1 | 0.74 | 0.85(0.03-21.31) | 0               | 1.00 |
| *08/*16 | 0 | 0.00 | 1 | 0.74 | 0.85(0.03-21.31) | 0               | 1.00 |
| *09/*09 | 1 | 1.92 | 0 | 0.00 | 7.89(0.32-197)   | 3.65(2.89-4.61) | 0.28 |
| *09/*11 | 0 | 0.00 | 1 | 0.74 | 0.85(0.03-21.31) | 0               | 1.00 |
| *10/*13 | 0 | 0.00 | 4 | 2.96 | 0.28(0.01-5.26)  | 0               | 0.58 |
| *10/*15 | 1 | 1.92 | 0 | 0.00 | 7.89(0.32-197)   | 3.65(2.89-4.61) | 0.28 |
| *11/*11 | 5 | 9.62 | 6 | 4.44 | 2.29(0.67-7.85)  | 1.7(0.85-3.4)   | 0.18 |
| *11/*13 | 0 | 0.00 | 8 | 5.93 | 0.14(0.01-2.52)  | 0               | 0.11 |
| *11/*14 | 2 | 3.85 | 2 | 1.48 | 2.66(0.36-19.41) | 1.83(0.67-5.02) | 0.31 |
| *11/*15 | 1 | 1.92 | 3 | 2.22 | 8.86(0.09-0.49)  | 0.9(0.16-4.98)  | 1    |
| *11/*16 | 3 | 5.77 | 2 | 1.48 | 4.07(0.66-25.11) | 2.23(1.05-4.74) | 0.13 |
| *13/*13 | 0 | 0.00 | 2 | 1.48 | 0.51(0.02-10.78) | 0               | 1.00 |
| *13/*14 | 0 | 0.00 | 2 | 1.48 | 0.51(0.02-10.78) | 0               | 1.00 |
| *13/*15 | 1 | 1.92 | 3 | 2.22 | 8.86(0.09-0.49)  | 0.9(0.16-4.98)  | 1    |
| *13/*16 | 1 | 1.92 | 4 | 2.96 | 0.86(8.87-5.89)  | 0.71(0.12-4.19) | 1    |
| *14/*16 | 1 | 1.92 | 1 | 0.74 | 0.85(0.03-21.31) | 0               | 1.00 |
| *15/*15 | 0 | 0.00 | 1 | 0.74 | 0.85(0.03-21.31) | 0               | 1.00 |
| *15/*16 | 2 | 3.85 | 3 | 2.22 | 1.77(0.29-10.85) | 1.46(0.48-4.37) | 0.62 |
| *16/*16 | 1 | 1.92 | 4 | 2.96 | 0.86(8.87-5.89)  | 0.71(0.12-4.19) | 1    |

HLA, human leukocyte antigen; HT, Hashimoto's thyroiditis; n, persons number; No., genotypes number; OR, odds ratio; CI, confidence interval; RR, risk ratio.

Table S3. Logistic regressions predicting BGD subgroup compared to control, based on HLA-DRB1 genotypes.

| HLA-DRB1 genotype | BGD subgroup (n = 25) |       | Control group (n = 135) |      | OR (95% C.I.)       | RR (95% C.I.)    | p*      |
|-------------------|-----------------------|-------|-------------------------|------|---------------------|------------------|---------|
|                   | No.                   | %     | No.                     | %    |                     |                  |         |
| *01/*04           | 1                     | 4.00  | 3                       | 2.22 | 1.83(0.18-18.38)    | 1.63(0.27-9.23)  | 0.5     |
| *01/*07           | 0                     | 0.00  | 8                       | 5.93 | 0.29(0.02-5.26)     | 0                | 0.36    |
| *01/*11           | 2                     | 8.00  | 7                       | 5.19 | 1.59(0.31-8.14)     | 1.46(0.41-5.24)  | 0.63    |
| *01/*13           | 0                     | 0.00  | 6                       | 4.44 | 0.39(0.02-7.16)     | 0                | 0.59    |
| *01/*15           | 1                     | 4.00  | 2                       | 1.48 | 2.77(0.24-31.79)    | 2.18(0.42-11.27) | 0.4     |
| *01/*16           | 1                     | 4.00  | 2                       | 1.48 | 2.77(0.24-31.79)    | 2.18(0.42-11.27) | 0.4     |
| *03/*03           | 0                     | 0.00  | 1                       | 0.74 | 1.76(0.07-44.41)    | 0                | 1       |
| *03/*04           | 1                     | 4.00  | 0                       | 0.00 | 16.59(0.66-419.52)  | 6.63(4.58-9.58)  | 0.16    |
| *03/*07           | 0                     | 0.00  | 2                       | 1.48 | 1.05(0.05-22.480)   | 0                | 1       |
| *03/*09           | 0                     | 0.00  | 1                       | 0.74 | 1.76(0.07-44.41)    | 0                | 1       |
| *03/*11           | 1                     | 4.00  | 8                       | 5.93 | 0.66(0.08-5.54)     | 0.70(0.11-4.60)  | 1       |
| *03/*13           | 1                     | 4.00  | 2                       | 1.48 | 2.77(0.24-31.79)    | 2.18(0.42-11.27) | 0.4     |
| *03/*14           | 0                     | 0.00  | 2                       | 1.48 | 1.05(0.05-22.480)   | 0                | 1       |
| *03/*15           | 2                     | 8.00  | 2                       | 1.48 | 5.78(0.77-43.15)    | 3.39(1.19-9.69)  | 0.12    |
| *03/*16           | 5                     | 20.00 | 0                       | 0.00 | 72.71(3.87-1365.46) | 7.75(5.15-1.67)  | <0.0001 |
| *04/*04           | 0                     | 0.00  | 1                       | 0.74 | 1.76(0.07-44.41)    | 0                | 1       |

HLA class II alleles involved in autoimmune thyroid diseases: Hashimoto's thyroiditis and the Basedow-Graves disease

|         |   |       |    |      |                    |                  |      |
|---------|---|-------|----|------|--------------------|------------------|------|
| *04/*11 | 3 | 12.00 | 10 | 7.41 | 1.70(0.43-6.69)    | 1.54(0.57-0.47)  | 0.43 |
| *04/*12 | 0 | 0.00  | 1  | 0.74 | 1.76(0.07-44.41)   | 0                | 1    |
| *04/*13 | 0 | 0.00  | 2  | 1.48 | 1.05(0.05-22.48)   | 0                | 1    |
| *04/*15 | 0 | 0.00  | 5  | 3.70 | 0.46(0.02-0.68)    | 0                | 1    |
| *04/*16 | 0 | 0.00  | 2  | 1.48 | 1.05(0.05-22.48)   | 0                | 1    |
| *07/*07 | 1 | 4.00  | 1  | 0.74 | 5.58(0.34-92.40)   | 3.29(0.78-13.82) | 0.29 |
| *07/*11 | 2 | 8.00  | 7  | 5.19 | 1.59(0.31-8.14)    | 1.46(0.41-5.24)  | 0.63 |
| *07/*12 | 0 | 0.00  | 1  | 0.74 | 1.76(0.07-44.41)   | 0                | 1    |
| *07/*13 | 0 | 0.00  | 5  | 3.70 | 0.46(0.02-0.68)    | 0                | 1    |
| *07/*14 | 2 | 8.00  | 1  | 0.74 | 11.65(1.01-133.88) | 4.55(1.88-11.03) | 0.06 |
| *07/*15 | 0 | 0.00  | 1  | 0.74 | 1.76(0.07-44.41)   | 0                | 1    |
| *07/*16 | 0 | 0.00  | 3  | 2.22 | 0.74(0.04-14.82)   | 0                | 1    |
| *08/*13 | 0 | 0.00  | 1  | 0.74 | 1.76(0.07-44.41)   | 0                | 1    |
| *08/*14 | 0 | 0.00  | 1  | 0.74 | 1.76(0.07-44.41)   | 0                | 1    |
| *08/*16 | 0 | 0.00  | 1  | 0.74 | 1.76(0.07-44.41)   | 0                | 1    |
| *09/*11 | 0 | 0.00  | 1  | 0.74 | 1.76(0.07-44.41)   | 0                | 1    |
| *10/*13 | 0 | 0.00  | 4  | 2.96 | 0.57(0.03-10.98)   | 0                | 1    |
| *11/*11 | 0 | 0.00  | 6  | 4.44 | 0.39(0.02-7.16)    | 0                | 0.59 |
| *11/*13 | 0 | 0.00  | 8  | 5.93 | 0.29(0.02-5.27)    | 0                | 0.36 |
| *11/*14 | 0 | 0.00  | 2  | 1.48 | 1.05(0.05-22.48)   | 0                | 1    |
| *11/*15 | 0 | 0.00  | 3  | 2.22 | 0.74(0.04-14.82)   | 0                | 1    |
| *11/*16 | 1 | 4.00  | 2  | 1.48 | 2.77(0.24-31.79)   | 2.18(0.42-11.27) | 0.4  |
| *13/*13 | 0 | 0.00  | 2  | 1.48 | 1.05(0.05-22.48)   | 0                | 1    |
| *13/*14 | 0 | 0.00  | 2  | 1.48 | 1.05(0.05-22.48)   | 0                | 1    |
| *13/*15 | 0 | 0.00  | 3  | 2.22 | 0.74(0.04-14.82)   | 0                | 1    |
| *13/*16 | 1 | 4.00  | 4  | 2.96 | 1.36(0.15-12.75)   | 1.29(0.22-7.75)  | 0.58 |
| *14/*16 | 0 | 0.00  | 1  | 0.74 | 1.76(0.07-44.41)   | 0                | 1    |
| *15/*15 | 0 | 0.00  | 1  | 0.74 | 1.76(0.07-44.41)   | 0                | 1    |
| *15/*16 | 0 | 0.00  | 3  | 2.22 | 0.74(0.04-14.82)   | 0                | 1    |
| *16/*16 | 0 | 0.00  | 4  | 2.96 | 0.57(0.03-10.98)   | 0                | 1    |

HLA, human leukocyte antigen; BGD, Basedow-Graves' disease; n, persons number; No., genotypes number; OR, odds ratio; CI, confidence interval; RR, risk ratio.

**Comparison between autoimmune thyroid diseases (AITD), Hashimoto's thyroiditis (HT), Basedow-Graves disease (BGD) and control groups, based on genotypes resulting from HLA-DQB1 typing**

The analysis of the relationship of the HLA-DQB1 genotypes with AITD, HT and BGD did not reveal any significant association with thyroid pathology (Tables S4, S5 and S6).

**Table S4. Logistic regressions predicting AITD group compared to control, based on HLA-DQB1 genotypes.**

| HLA-DQB1 genotype | AITD group (n = 77) |       | Control group (n = 135) |       | OR (95% C.I.)    | RR(95% C.I.)    | p*   |
|-------------------|---------------------|-------|-------------------------|-------|------------------|-----------------|------|
|                   | No.                 | %     | No.                     | %     |                  |                 |      |
| *02/*02           | 0                   | 0.00  | 3                       | 2.22  | 0.24(0.01-4.79)  | 0               | 0.55 |
| *02/*03           | 12                  | 15.58 | 15                      | 11.11 | 1.47(0.65-3.34)  | 1.27(0.79-2.01) | 0.39 |
| *02/*04           | 1                   | 1.30  | 0                       | 0.00  | 5.31(0.21-132.2) | 2.77(2.32-3.32) | 0.36 |
| *02/*05           | 12                  | 15.58 | 12                      | 8.89  | 1.89(0.8-4.45)   | 1.45(0.93-2.26) | 0.18 |
| *02/*06           | 6                   | 7.79  | 7                       | 5.19  | 1.55(0.50-4.78)  | 1.29(0.70-2.40) | 0.55 |
| *03/*03           | 11                  | 14.29 | 29                      | 21.48 | 0.61(0.29-1.30)  | 0.72(0.42-2.23) | 0.27 |
| *03/*04           | 0                   | 0.00  | 0                       | 0.00  | 0                | 0               | 0    |
| *03/*05           | 15                  | 19.48 | 20                      | 14.81 | 1.39(0.67-2.91)  | 1.22(0.79-1.89) | 0.44 |
| *03/*06           | 6                   | 7.79  | 16                      | 11.85 | 0.63(0.24-1.68)  | 0.73(0.36-1.48) | 0.48 |
| *04/*04           | 0                   | 0.00  | 0                       | 0.00  | 0                | 0               | 0    |
| *04/*05           | 0                   | 0.00  | 2                       | 1.48  | 0.34(0.02-728)   | 0               | 0.54 |
| *04/*06           | 0                   | 0.00  | 0                       | 0.00  | 0                | 0               | 0    |
| *05/*05           | 5                   | 6.49  | 7                       | 5.19  | 1.27(0.39-4.15)  | 1.16(0.58-2.32) | 0.76 |
| *05/*06           | 9                   | 11.69 | 20                      | 14.81 | 0.76(0.33-1.77)  | 0.84(0.47-1.48) | 0.68 |
| *06/*06           | 0                   | 0.00  | 4                       | 2.96  | 0.19(0.01-3.55)  | 0               | 0.30 |

HLA, human leukocyte antigen; AITD, autoimmune thyroid disease; n, persons number; No., genotypes number; OR, odds ratio; CI, confidence interval; RR, risk ratio.

**Table S5. Logistic regressions predicting HT subgroup compared to control, based on HLA-DQB1 genotypes.**

| HLA-DQB1 genotype | HT subgroup (n = 52) |       | Control group (n = 135) |       | OR (95% C.I.)    | RR(95% C.I.)    | p*   |
|-------------------|----------------------|-------|-------------------------|-------|------------------|-----------------|------|
|                   | No.                  | %     | No.                     | %     |                  |                 |      |
| *02/*02           | 0                    | 0     | 3                       | 2.22  | 0.36(0.02-7.11)  | 0               | 0.56 |
| *02/*03           | 7                    | 13.46 | 15                      | 11.11 | 1.24(0.48-3.25)  | 1.17(0.60-2.26) | 0.62 |
| *02/*04           | 1                    | 1.92  | 0                       | 0.00  | 7.89(0.32-197.0) | 3.65(2.89-4.61) | 0.28 |
| *02/*05           | 7                    | 13.46 | 12                      | 8.89  | 1.59(0.59-4.30)  | 1.38(0.73-2.61) | 0.42 |
| *02/*06           | 3                    | 5.77  | 7                       | 5.19  | 1.12(0.28-4.51)  | 1.08(0.41-2.88) | 1.00 |
| *03/*03           | 8                    | 15.38 | 29                      | 21.48 | 0.66(0.28-1.57)  | 0.74(0.38-1.43) | 0.42 |
| *03/*04           | 0                    | 0.00  | 0                       | 0.00  | 0                | 0               | 0    |
| *03/*05           | 9                    | 17.31 | 20                      | 14.81 | 1.20(0.51-2.85)  | 1.14(0.63-2.08) | 0.66 |
| *03/*06           | 6                    | 11.54 | 16                      | 11.85 | 0.97(0.36-2.63)  | 0.98(0.47-2.82) | 1.00 |
| *04/*04           | 0                    | 0.00  | 0                       | 0.00  | 0                | 0               | 0    |
| *04/*05           | 0                    | 0.00  | 2                       | 1.48  | 0.51(0.02-10.78) | 0               | 1.00 |
| *04/*06           | 0                    | 0.00  | 0                       | 0.00  | 0                | 0               | 0    |
| *05/*05           | 4                    | 7.69  | 7                       | 5.19  | 1.52(0.43-5.44)  | 1.33(0.59-3.02) | 0.50 |
| *05/*06           | 7                    | 13.46 | 20                      | 14.81 | 0.89(0.35-2.26)  | 0.92(0.47-1.83) | 1.00 |
| *06/*06           | 0                    | 0.00  | 4                       | 2.96  | 0.27(0.01-5.26)  | 0               | 0.58 |

HLA, human leukocyte antigen; HT, Hashimoto's thyroiditis; n, persons number; No., genotypes number; OR, odds ratio; CI, confidence interval; RR, risk ratio.

Table S6. Logistic regressions predicting BGD subgroup compared to control, based on HLA-DQB1 genotypes.

| HLA-DQB1<br>genotype | BGD<br>subgroup<br>(n = 25) |       | Control group<br>(n = 135) |       | OR (95% C.I.)    | RR(95% C.I.)    | p*   |
|----------------------|-----------------------------|-------|----------------------------|-------|------------------|-----------------|------|
|                      | No.                         | %     | No.                        | %     |                  |                 |      |
| *02/*02              | 0                           | 0     | 3                          | 2.22  | 0.74(0.04-14.82) | 0               | 1.00 |
| *02/*03              | 5                           | 20.00 | 15                         | 11.11 | 2.00(0.65-6.12)  | 1.75(0.74-4.14) | 0.32 |
| *02/*04              | 0                           | 0.00  | 0                          | 0.00  | 0                | 0               | 0    |
| *02/*05              | 5                           | 20.00 | 12                         | 8.89  | 2.56(0.52-8.06)  | 2.10(0.91-4.88) | 0.15 |
| *02/*06              | 3                           | 12.00 | 7                          | 5.19  | 2.49(0.60-1.38)  | 2.05(0.74-5.69) | 0.19 |
| *03/*03              | 3                           | 12.00 | 29                         | 21.48 | 0.50(0.14-1.78)  | 0.55(0.17-1.71) | 0.41 |
| *03/*04              | 0                           | 0.00  | 0                          | 0.00  | 0                | 0               | 0    |
| *03/*05              | 6                           | 24.00 | 20                         | 14.81 | 1.82(0.65-5.11)  | 1.63(0.72-3.68) | 0.25 |
| *03/*06              | 0                           | 0.00  | 16                         | 11.85 | 0.14(0.01-2.45)  | 0               | 0.08 |
| *04/*04              | 0                           | 0.00  | 0                          | 0.00  | 0                | 0               | 0    |
| *04/*05              | 0                           | 0.00  | 2                          | 1.48  | 1.05(0.05-22.48) | 0               | 1.00 |
| *04/*06              | 0                           | 0.00  | 0                          | 0.00  | 0                | 0               | 0    |
| *05/*05              | 1                           | 4.00  | 7                          | 5.19  | 0.76(0.09-6.48)  | 0.79(0.12-5.14) | 1.00 |
| *05/*06              | 2                           | 8.00  | 20                         | 14.81 | 0.5(0.11-2.29)   | 0.55(0.14-2.15) | 0.53 |
| *06/*06              | 0                           | 0.00  | 4                          | 2.96  | 0.57(0.03-10.98) | 0               | 1.00 |

HLA, human leukocyte antigen; BGD, Basedow-Graves' disease; n, persons number; No., genotypes number; OR, odds ratio; CI, confidence interval; RR, risk ratio.

**Comparison between autoimmune thyroid diseases (AITD), Hashimoto's thyroiditis (HT), Basedow-Graves disease (BGD) and control groups, based on HLA-DRB1/DQB1 haplotypes resulting**

The association of HLA-DRB1/DQB1 haplotypes with AITD, HT and GD (Tables S7, S8, S9) revealed a significant positive association for the DRB1\*03/DQB1\*06 haplotype in the BGD subgroup.

Table S7. Logistic regressions predicting AITD group compared to control, based on HLA-DRB1/DQB1 haplotypes.

| HLA-DRB1/DQB1<br>haplotype | AITD group<br>(n = 77) |       | Control group<br>(n = 135) |       | OR (95% C.I.)     | RR (95% C.I)    | p*    |
|----------------------------|------------------------|-------|----------------------------|-------|-------------------|-----------------|-------|
|                            | No.                    | %     | No.                        | %     |                   |                 |       |
| DRB1*01/DQB1*02            | 3                      | 3.90  | 7                          | 5.19  | 0.74(0.19-2.95)   | 0.82(0.31-2.15) | 0.75  |
| DRB1*01/DQB1*03            | 7                      | 9.09  | 12                         | 8.89  | 1.03(0.39-2.72)   | 1.02(0.55-1.88) | 1.00  |
| DRB1*01/DQB1*04            | -                      | -     | -                          | -     | -                 | -               | -     |
| DRB1*01/DQB1*05            | 8                      | 10.39 | 27                         | 20.00 | 1.22(0.62-2.40)   | 1.13(0.75-1.71) | 0.60  |
| DRB1*01/DQB1*06            | 4                      | 5.19  | 7                          | 5.19  | 1.00(0.28-3.54)   | 1.00(0.45-2.24) | 1.00  |
| DRB1*03/DQB1*02            | 11                     | 14.29 | 16                         | 11.85 | 1.24(0.54 -2.83 ) | 1.14(0.70-1.87) | 0.67  |
| DRB1*03/DQB1*03            | 6                      | 7.79  | 10                         | 7.41  | 1.06(0.37-3.03)   | 1.04(0.54-2.00) | 1.00  |
| DRB1*03/DQB1*05            | 0                      | 0.00  | 4                          | 2.96  | 0.19(0.01-3.55)   | 0               | 0.30  |
| DRB1*03/DQB1*06            | 4                      | 5.19  | 3                          | 2.22  | 2.41(0.53-11.07)  | 1.60(0.87-3.13) | 0.26  |
| DRB1*04/DQB1*02            | 2                      | 2.60  | 0                          | 0.00  | 8.97(0.42-189.50) | 2.80(2.34-3.36) | 0.13  |
| DRB1*04/DQB1*03            | 14                     | 18.18 | 24                         | 17.78 | 1.03(0.50-2.13)   | 1.02(0.64-1.61) | 1.00  |
| DRB1*04/DQB1*05            | 2                      | 2.60  | 5                          | 3.70  | 0.69(0.13-3.66)   | 0.78(0.24-2.56) | 1.00  |
| DRB1*04/DQB1*06            | 4                      | 5.19  | 7                          | 5.19  | 1.00(0.28-3.56)   | 1.00(0.45-2.24) | 1.00  |
| DRB1*07/DQB1*02            | 10                     | 12.99 | 20                         | 14.81 | 0.86(0.38-1.94)   | 0.91(0.53-1.56) | 0.84  |
| DRB1*07/DQB1*03            | 8                      | 10.39 | 13                         | 9.63  | 1.09(0.43-2.76)   | 1.05(0.59-1.88) | 1.00  |
| DRB1*07/DQB1*04            | 1                      | 1.30  | 0                          | 0.00  | 5.31(0.21-132.15) | 2.78(2.32-3.32) | 0.36  |
| DRB1*07/DQB1*05            | 4                      | 5.19  | 7                          | 5.19  | 1.00(0.28-3.56)   | 1.00(0.45-2.24) | 1.00  |
| DRB1*07/DQB1*06            | 2                      | 2.60  | 6                          | 4.44  | 0.57(0.11-2.91)   | 0.68(0.02-2.29) | 0.71  |
| DRB1*08/DQB1*02            | 2                      | 2.60  | 0                          | 0.00  | 8.97(0.42-189.50) | 2.80(2.34-3.36) | 0.13  |
| DRB1*08/DQB1*03            | 1                      | 1.30  | 1                          | 0.74  | 1.76(0.11-28.61)  | 1.38(0.34-5.59) | 1.00  |
| DRB1*08/DQB1*04            | 1                      | 1.30  | 2                          | 1.48  | 0.88(0.08-9.82)   | 0.92(0.18-4.59) | 1.00  |
| DRB1*08/DQB1*05            | 0                      | 0.00  | 2                          | 1.48  | 0.34(0.02-7.27)   | 0               | 0.54  |
| DRB1*08/DQB1*06            | 0                      | 0.00  | 1                          | 0.74  | 0.58(0.02-14.39)  | 0               | 1.00  |
| DRB1*09/DQB1*02            | 0                      | 0.00  | 1                          | 0.74  | 0.58(0.02-14.39)  | 0               | 1.00  |
| DRB1*09/DQB1*03            | 1                      | 1.30  | 2                          | 1.48  | 0.88(0.08-9.82)   | 0.92(0.18-4.59) | 1.00  |
| DRB1*10/DQB1*05            | 1                      | 1.30  | 3                          | 2.22  | 0.58(0.06-5.67)   | 0.68(0.12-3.78) | 1.00  |
| DRB1*10/DQB1*06            | 1                      | 1.30  | 3                          | 2.22  | 0.58(0.06-5.67)   | 0.68(0.12-3.78) | 1.00  |
| DRB1*11/DQB1*02            | 8                      | 10.39 | 10                         | 7.41  | 1.45(0.55-3.84)   | 1.25(0.72-2.17) | 0.45  |
| DRB1*11/DQB1*03            | 28                     | 36.36 | 54                         | 40.00 | 0.86(0.48-1.53)   | 0.91(0.62-1.32) | 0.66  |
| DRB1*11/DQB1*05            | 10                     | 12.99 | 12                         | 8.89  | 1.53(0.63-7.73)   | 1.29(0.78-2.12) | 0.36  |
| DRB1*11/DQB1*06            | 1                      | 1.30  | 6                          | 4.44  | 0.28(0.03-2.40)   | 0.39(0.06-2.39) | 0.43  |
| DRB1*13/DQB1*03            | 0                      | 0.00  | 8                          | 5.93  | 0.10(0.01-1.70)   | 0               | 0.053 |
| DRB1*13/DQB1*06            | 0                      | 0.00  | 3                          | 2.22  | 0.24(0.01-4.79)   | 0               | 0.56  |



|                 |   |      |   |      |                  |                 |      |
|-----------------|---|------|---|------|------------------|-----------------|------|
| DRB1*14/DQB1*03 | 2 | 2.60 | 2 | 1.48 | 1.77(0.24-12.85) | 1.39(0.51-3.76) | 0.62 |
| DRB1*14/DQB1*05 | 2 | 2.60 | 2 | 1.48 | 1.77(0.24-12.85) | 1.39(0.51-3.76) | 0.62 |
| DRB1*15/DQB1*03 | 1 | 1.30 | 3 | 2.22 | 0.58(0.06-5.67)  | 0.68(0.12-3.78) | 1.00 |
| DRB1*15/DQB1*06 | 1 | 1.30 | 3 | 2.22 | 0.58(0.06-5.67)  | 0.68(0.12-3.78) | 1.00 |
| DRB1*16/DQB1*03 | 4 | 5.19 | 2 | 1.48 | 3.64(0.65-20.38) | 1.88(1.04-3.41) | 0.19 |
| DRB1*16/DQB1*05 | 4 | 5.19 | 2 | 1.48 | 3.64(0.65-20.38) | 1.88(1.04-3.41) | 0.19 |

HLA, human leukocyte antigen; AITD, autoimmune thyroid disease; n, persons number; No., haplotypes number; OR, odds ratio; CI, confidence interval; RR, risk ratio.

Table S8. Logistic regressions predicting HT subgroup compared to control, based on HLA-DRB1/DQB1 haplotypes.

| HLA-DRB1/DQB1<br>haplotype | HT subgroup<br>(n = 52) |       | Control group<br>(n = 135) |       | OR (95% C.I.)      | RR (95% C.I.)   | p*   |
|----------------------------|-------------------------|-------|----------------------------|-------|--------------------|-----------------|------|
|                            | No.                     | %     | No.                        | %     |                    |                 |      |
| DRB1*01/DQB1*02            | 3                       | 5.77  | 7                          | 5.19  | 1.11(0.27-4.5)     | 1.08(0.4-2.87)  | 1    |
| DRB1*01/DQB1*03            | 4                       | 7.69  | 12                         | 8.89  | 0.85(0.26-2.77)    | 0.89(0.36-2.15) | 1    |
| DRB1*01/DQB1*04            | -                       | -     | -                          | -     | -                  | -               | -    |
| DRB1*01/DQB1*05            | 13                      | 25.00 | 27                         | 20.00 | 1.33(0.62-2.84)    | 1.22(0.72-2.06) | 0.55 |
| DRB1*01/DQB1*06            | 6                       | 11.54 | 7                          | 5.19  | 1.11(0.27-4.5)     | 1.08(0.4-2.87)  | 1    |
| DRB1*03/DQB1*02            | 6                       | 11.54 | 16                         | 11.85 | 0.97(0.36-2.63)    | 0.98(0.47-2.02) | 1    |
| DRB1*03/DQB1*03            | 4                       | 7.69  | 10                         | 7.41  | 1.04(0.31-3.48)    | 1.03(0.43-2.43) | 1    |
| DRB1*03/DQB1*05            | 0                       | 0.00  | 4                          | 2.96  | 0.28(0.01-5.26)    | 0               | 0.58 |
| DRB1*03/DQB1*06            | 1                       | 1.92  | 3                          | 2.22  | 0.86(0.09-8.49)    | 0.90(0.16-4.98) | 1.00 |
| DRB1*04/DQB1*02            | 1                       | 1.92  | 0                          | 0.00  | 7.89(0.32-197.05)  | 3.65(2.89-4.61) | 0.28 |
| DRB1*04/DQB1*03            | 9                       | 17.31 | 24                         | 17.78 | 0.97(0.42-2.25)    | 0.98(0.53-1.8)  | 1    |
| DRB1*04/DQB1*05            | 1                       | 1.92  | 5                          | 3.70  | 0.51(0.06-4.47)    | 0.59(0.10-3.60) | 1    |
| DRB1*04/DQB1*06            | 4                       | 7.69  | 7                          | 5.19  | 1.52(0.43-5.44)    | 1.33(0.59-3.02) | 0.50 |
| DRB1*07/DQB1*02            | 7                       | 13.46 | 20                         | 14.81 | 0.89(0.35-2.26)    | 0.92(0.47-1.83) | 1    |
| DRB1*07/DQB1*03            | 5                       | 9.62  | 13                         | 9.63  | 1(0.33-2.95)       | 1(0.45-2.18)    | 1    |
| DRB1*07/DQB1*04            | 1                       | 1.92  | 0                          | 0.00  | 7.89(0.32-197.05)  | 3.65(2.89-4.61) | 0.28 |
| DRB1*07/DQB1*05            | 2                       | 3.85  | 7                          | 5.19  | 0.73(0.14-3.64)    | 0.79(0.23-2.75) | 1    |
| DRB1*07/DQB1*06            | 2                       | 3.85  | 6                          | 4.44  | 0.86(0.17-4.41)    | 0.90(0.26-3.04) | 1    |
| DRB1*08/DQB1*02            | 2                       | 3.85  | 0                          | 0.00  | 13.42(0.63-284.49) | 3.70(2.92-4.69) | 0.08 |
| DRB1*08/DQB1*03            | 1                       | 1.92  | 1                          | 0.74  | 2.63(0.16-42.83)   | 1.81(0.44-7.40) | 0.48 |
| DRB1*08/DQB1*04            | 1                       | 1.92  | 2                          | 1.48  | 1.3(0.12-14.70)    | 1.20(0.24-6.06) | 1    |
| DRB1*08/DQB1*05            | 0                       | 0.00  | 2                          | 1.48  | 0.5(0.02-10.78)    | 0               | 1    |
| DRB1*08/DQB1*06            | 0                       | 0.00  | 1                          | 0.74  | 0.85(0.03-21.31)   | 0               | 1    |
| DRB1*09/DQB1*02            | 0                       | 0.00  | 1                          | 0.74  | 0.85(0.03-21.31)   | 0               | 1    |
| DRB1*09/DQB1*03            | 1                       | 1.92  | 2                          | 1.48  | 1.3(0.12-14.70)    | 1.20(0.24-6.06) | 1    |
| DRB1*10/DQB1*05            | 1                       | 1.92  | 3                          | 2.22  | 0.86(0.09-8.49)    | 0.90(0.16-4.98) | 1.00 |
| DRB1*10/DQB1*06            | 1                       | 1.92  | 3                          | 2.22  | 0.86(0.09-8.49)    | 0.90(0.16-4.98) | 1.00 |
| DRB1*11/DQB1*02            | 5                       | 9.62  | 10                         | 7.41  | 1.33(0.43-4.10)    | 1.22(0.57-2.60) | 0.76 |
| DRB1*11/DQB1*03            | 19                      | 36.54 | 54                         | 40.00 | 0.86(0.45-1.67)    | 0.9(0.56-1.46)  | 0.74 |
| DRB1*11/DQB1*05            | 7                       | 13.46 | 12                         | 8.89  | 1.59(0.59-4.30)    | 1.38(0.73-2.61) | 0.42 |
| DRB1*11/DQB1*06            | 1                       | 1.92  | 6                          | 4.44  | 0.42(0.05-3.59)    | 0.5(0.08-3.14)  | 0.68 |
| DRB1*13/DQB1*03            | 0                       | 0.00  | 8                          | 5.93  | 0.14(0.01-2.52)    | 0               | 0.11 |
| DRB1*13/DQB1*06            | 0                       | 0.00  | 3                          | 2.22  | 0.36(0.02-7.11)    | 0               | 0.56 |
| DRB1*14/DQB1*03            | 2                       | 3.85  | 2                          | 1.48  | 2.66(0.36-19.41)   | 1.83(0.67-5.02) | 0.31 |
| DRB1*14/DQB1*05            | 2                       | 3.85  | 2                          | 1.48  | 2.66(0.36-19.41)   | 1.83(0.67-5.02) | 0.31 |
| DRB1*15/DQB1*03            | 1                       | 1.92  | 3                          | 2.22  | 0.86(0.09-8.49)    | 0.90(0.16-4.98) | 1.00 |
| DRB1*15/DQB1*06            | 1                       | 1.92  | 3                          | 2.22  | 0.86(0.09-8.49)    | 0.90(0.16-4.98) | 1.00 |
| DRB1*16/DQB1*03            | 3                       | 5.77  | 2                          | 1.48  | 4.07(0.66-25.11)   | 2.23(1.50-4.74) | 0.13 |
| DRB1*16/DQB1*05            | 3                       | 5.77  | 2                          | 1.48  | 4.07(0.66-25.11)   | 2.23(1.50-4.74) | 0.13 |

HLA, human leukocyte antigen; HT, Hashimoto's thyroiditis; n, persons number; No., haplotypes number; OR, odds ratio; CI, confidence interval; RR, risk ratio.

Table S9. Logistic regressions predicting BGD subgroup compared to control, based on HLA-DRB1/DQB1 haplotypes.

| HLA-DRB1/DQB1<br>haplotype | BGD<br>subgroup<br>(n = 25) |       | Control group<br>(n = 135) |       | OR (95% C.I.)      | RR (95% C.I.)    | p*    |
|----------------------------|-----------------------------|-------|----------------------------|-------|--------------------|------------------|-------|
|                            | No.                         | %     | No.                        | %     |                    |                  |       |
| DRB1*01/DQB1*02            | 0                           | 0.00  | 7                          | 5.19  | 0.33(0.02-6.07)    | 0                | 0.6   |
| DRB1*01/DQB1*03            | 3                           | 12.00 | 12                         | 8.89  | 1.40(0.36-5.36)    | 1.32(0.45-3.89)  | 0.71  |
| DRB1*01/DQB1*04            | -                           | -     | -                          | -     | -                  | -                | -     |
| DRB1*01/DQB1*05            | 5                           | 20.00 | 27                         | 20.00 | 1(0.34-2.91)       | 1(0.41-2.46)     | 1.00  |
| DRB1*01/DQB1*06            | 1                           | 4.00  | 7                          | 5.19  | 0.76(0.09-6.48)    | 0.79(0.12-5.14)  | 1     |
| DRB1*03/DQB1*02            | 5                           | 20.00 | 16                         | 11.85 | 0.86(0.61-5.63)    | 1.65(0.70-3.93)  | 0.33  |
| DRB1*03/DQB1*03            | 2                           | 8.00  | 10                         | 7.41  | 1.09(0.22-5.29)    | 1.07(0.29-4.01)  | 1.00  |
| DRB1*03/DQB1*05            | 0                           | 0.00  | 4                          | 2.96  | 0.57(0.03-10.98)   | 0                | 1     |
| DRB1*03/DQB1*06            | 3                           | 12.00 | 3                          | 2.22  | 6.00(1.14-31.66)   | 3.5(1.44-8.51)   | 0.049 |
| DRB1*04/DQB1*02            | 1                           | 4.00  | 0                          | 0.00  | 16.59(0.66-419.52) | 0.63(4.58-9.58)  | 0.16  |
| DRB1*04/DQB1*03            | 5                           | 20.00 | 24                         | 17.78 | 1.16(0.39-3.39)    | 1.13(0.46-2.76)  | 0.78  |
| DRB1*04/DQB1*05            | 1                           | 4.00  | 5                          | 3.70  | 1.08(0.12-9.69)    | 1.07(0.17-6.65)  | 1     |
| DRB1*04/DQB1*06            | 0                           | 0.00  | 7                          | 5.19  | 0.34(0.02-6.07)    | 0                | 0.60  |
| DRB1*07/DQB1*02            | 2                           | 8.00  | 20                         | 14.81 | 0.78(0.21-2.87)    | 0.81(0.26-2.50)  | 1.00  |
| DRB1*07/DQB1*03            | 3                           | 12.00 | 13                         | 9.63  | 1.28(0.34-4.86)    | 1.23(0.41-3.65)  | 0.72  |
| DRB1*07/DQB1*04            | -                           | -     | -                          | -     | -                  | -                | -     |
| DRB1*07/DQB1*05            | 2                           | 8.00  | 7                          | 5.19  | 1.59(0.31-8.14)    | 1.46(0.41-5.24)  | 0.63  |
| DRB1*07/DQB1*06            | 0                           | 0.00  | 6                          | 4.44  | 0.39(0.02-7.16)    | 0                | 0.59  |
| DRB1*08/DQB1*02            | -                           | -     | -                          | -     | -                  | -                | -     |
| DRB1*08/DQB1*03            | 0                           | 0.00  | 1                          | 0.74  | 1.76(.07-44.41)    | 0                | 1.00  |
| DRB1*08/DQB1*04            | 0                           | 0.00  | 2                          | 1.48  | 1.05(0.05-22.48)   | 0                | 1.00  |
| DRB1*08/DQB1*05            | 0                           | 0.00  | 2                          | 1.48  | 1.05(0.05-22.48)   | 0                | 1.00  |
| DRB1*08/DQB1*06            | 0                           | 0.00  | 1                          | 0.74  | 1.76(.07-44.41)    | 0                | 1.00  |
| DRB1*09/DQB1*02            | 0                           | 0.00  | 1                          | 0.74  | 1.76(.07-44.41)    | 0                | 1.00  |
| DRB1*09/DQB1*03            | 0                           | 0.00  | 2                          | 1.48  | 1.05(0.05-22.48)   | 0                | 1.00  |
| DRB1*10/DQB1*05            | 0                           | 0.00  | 3                          | 2.22  | 0.74(0.04-14.82)   | 0                | 1.00  |
| DRB1*10/DQB1*06            | 0                           | 0.00  | 3                          | 2.22  | 0.74(0.04-14.82)   | 0                | 1.00  |
| DRB1*11/DQB1*02            | 3                           | 12.00 | 10                         | 7.41  | 1.70(0.43-6.69)    | 1.54(0.53-4.74)  | 0.43  |
| DRB1*11/DQB1*03            | 9                           | 36.00 | 54                         | 40.00 | 0.84(0.53-2.05)    | 0.87(0.41-1.84)  | 0.82  |
| DRB1*11/DQB1*05            | 3                           | 12.00 | 12                         | 8.89  | 1.40(0.36-5.36)    | 1.32(0.45-3.89)  | 0.71  |
| DRB1*11/DQB1*06            | 0                           | 0.00  | 6                          | 4.44  | 0.39(0.02-7.16)    | 0                | 0.59  |
| DRB1*13/DQB1*03            | 0                           | 0.00  | 8                          | 5.93  | 0.29(0.02-5.26)    | 0                | 0.36  |
| DRB1*13/DQB1*06            | 0                           | 0.00  | 3                          | 2.22  | 0.74(0.04-14.82)   | 0                | 1.00  |
| DRB1*14/DQB1*03            | 0                           | 0.00  | 2                          | 1.48  | 1.05(0.05-22.48)   | 0                | 1.00  |
| DRB1*14/DQB1*05            | 0                           | 0.00  | 2                          | 1.48  | 1.05(0.05-22.48)   | 0                | 1.00  |
| DRB1*15/DQB1*03            | 0                           | 0.00  | 3                          | 2.22  | 0.74(0.04-14.82)   | 0                | 1.00  |
| DRB1*15/DQB1*06            | 0                           | 0.00  | 3                          | 2.22  | 0.74(0.04-14.82)   | 0                | 1.00  |
| DRB1*16/DQB1*03            | 1                           | 4.00  | 2                          | 1.48  | 2.77(0.24-31.79)   | 2.18(0.42-11.27) | 0.40  |
| DRB1*16/DQB1*05            | 1                           | 4.00  | 2                          | 1.48  | 2.77(0.24-31.79)   | 2.18(0.42-11.27) | 0.40  |

HLA, human leukocyte antigen; BGD, Basedow-Graves' disease; n, persons number; No., haplotypes number; OR, odds ratio; CI, confidence interval; RR, risk ratio.
